# Supplementary material
Source: PubMed Central journal article supplement (PMC6454881)
Supplement: NIHMS1021110-supplement-1.pdf [file NIHMS1021110-supplement-1.pdf]

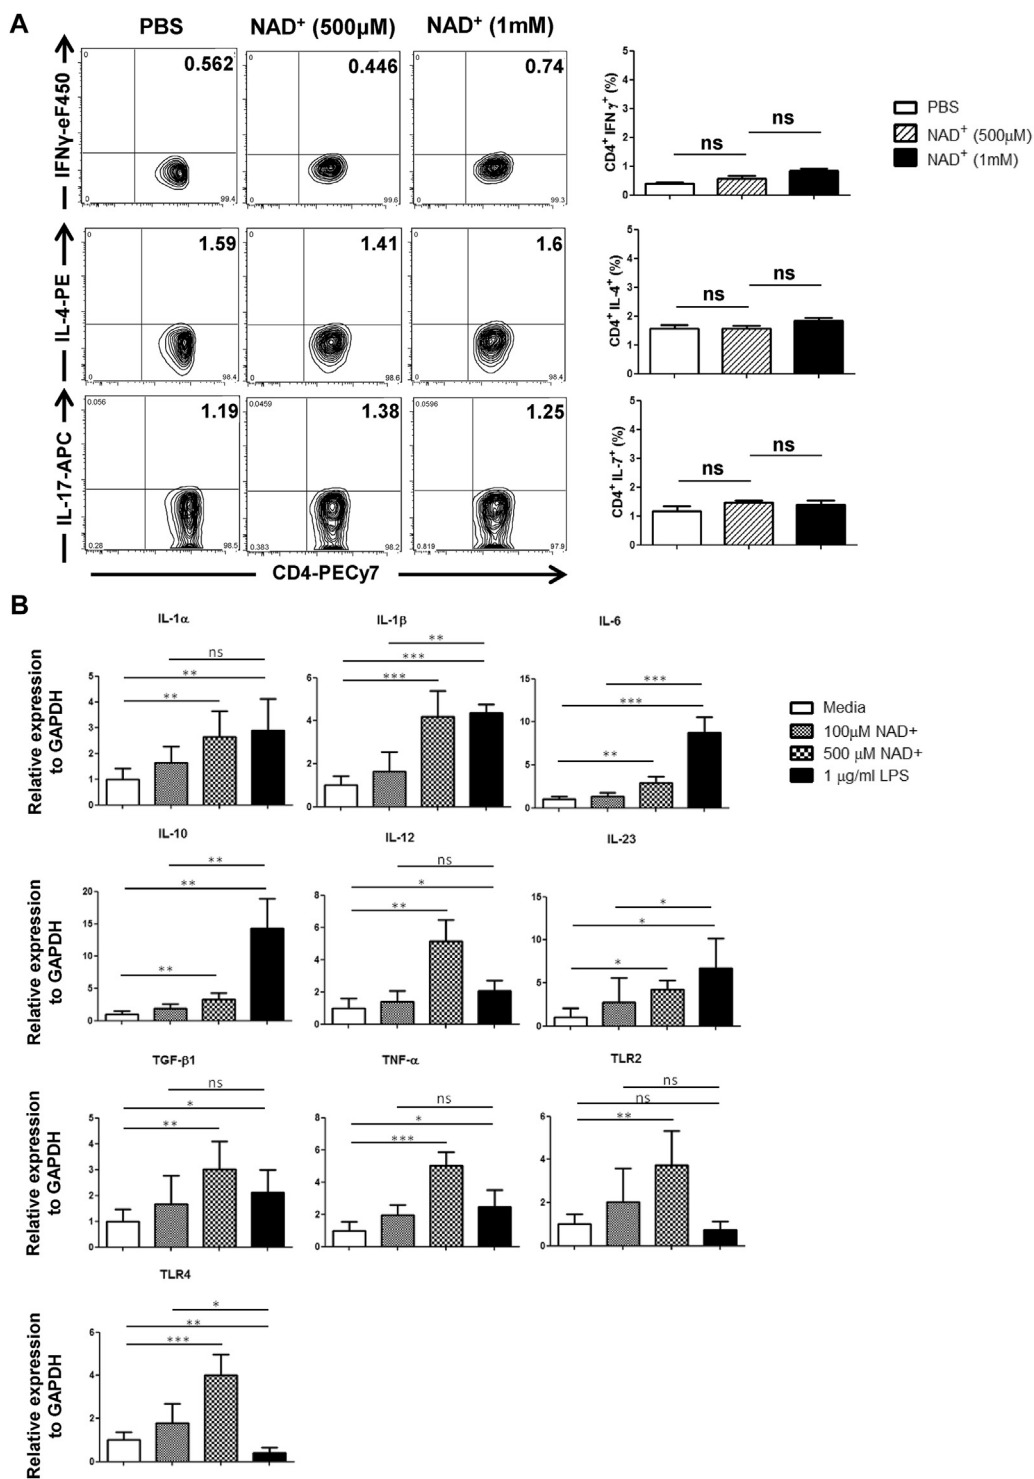

**FIG E1.** High doses of NAD<sup>+</sup> do not promote naive CD4<sup>+</sup> T-cell differentiation *in vitro*, and NAD<sup>+</sup> regulates CD11b<sup>+</sup>CD11c<sup>+</sup> DC cytokine production *in vitro* in a dose-dependent manner. **A**, Sorted naive CD4<sup>+</sup>CD44<sup>+</sup>CD62L<sup>+</sup> T cells were isolated from spleens of C57BL/6 mice and cultured in complete media with increasing concentrations of NAD<sup>+</sup> (500 μmol/L and 1 mmol/L) or PBS. After 96 hours, frequencies of CD4<sup>+</sup>IFN-γ<sup>+</sup>, CD4<sup>+</sup>IL-4<sup>+</sup>, and CD4<sup>+</sup>IL-17A<sup>+</sup> cells were assessed by using flow cytometry (n = 10). Data were derived from 3 independent experiments. **B**, Sorted CD11b<sup>+</sup>CD11c<sup>+</sup> DCs were isolated from spleens of C57BL/6 mice and cultured (1 × 10<sup>6</sup> cells/well) in complete media and in the presence of increasing concentrations of NAD<sup>+</sup> (100 μmol/L and 500 μmol/L). As a positive control, CD11b<sup>+</sup>CD11c<sup>+</sup> DCs were cultured in the presence of LPS (1 μg/ml). After 16 hours of culture, cells were collected, and mRNA expression levels of IL-1α, IL-1β, IL-6, IL-10, IL-12, IL-23, TGF-β, TNF-α, TLR2, and TLR4 were determined by using real-time PCR. Values are expressed as fold expression relative to the housekeeping gene glyceraldehyde-3-phosphate dehydrogenase (*GAPDH*; n = 5). Data were derived from 2 different experiments. *ns*, Not significant. \**P* < .05, \*\**P* < .01, and \*\*\**P* < .001, as determined by means of ANOVA, comparing the indicated groups. Data represent means ± SDs. *APC*, Allophycocyanin; *PE*, phycoerythrin.

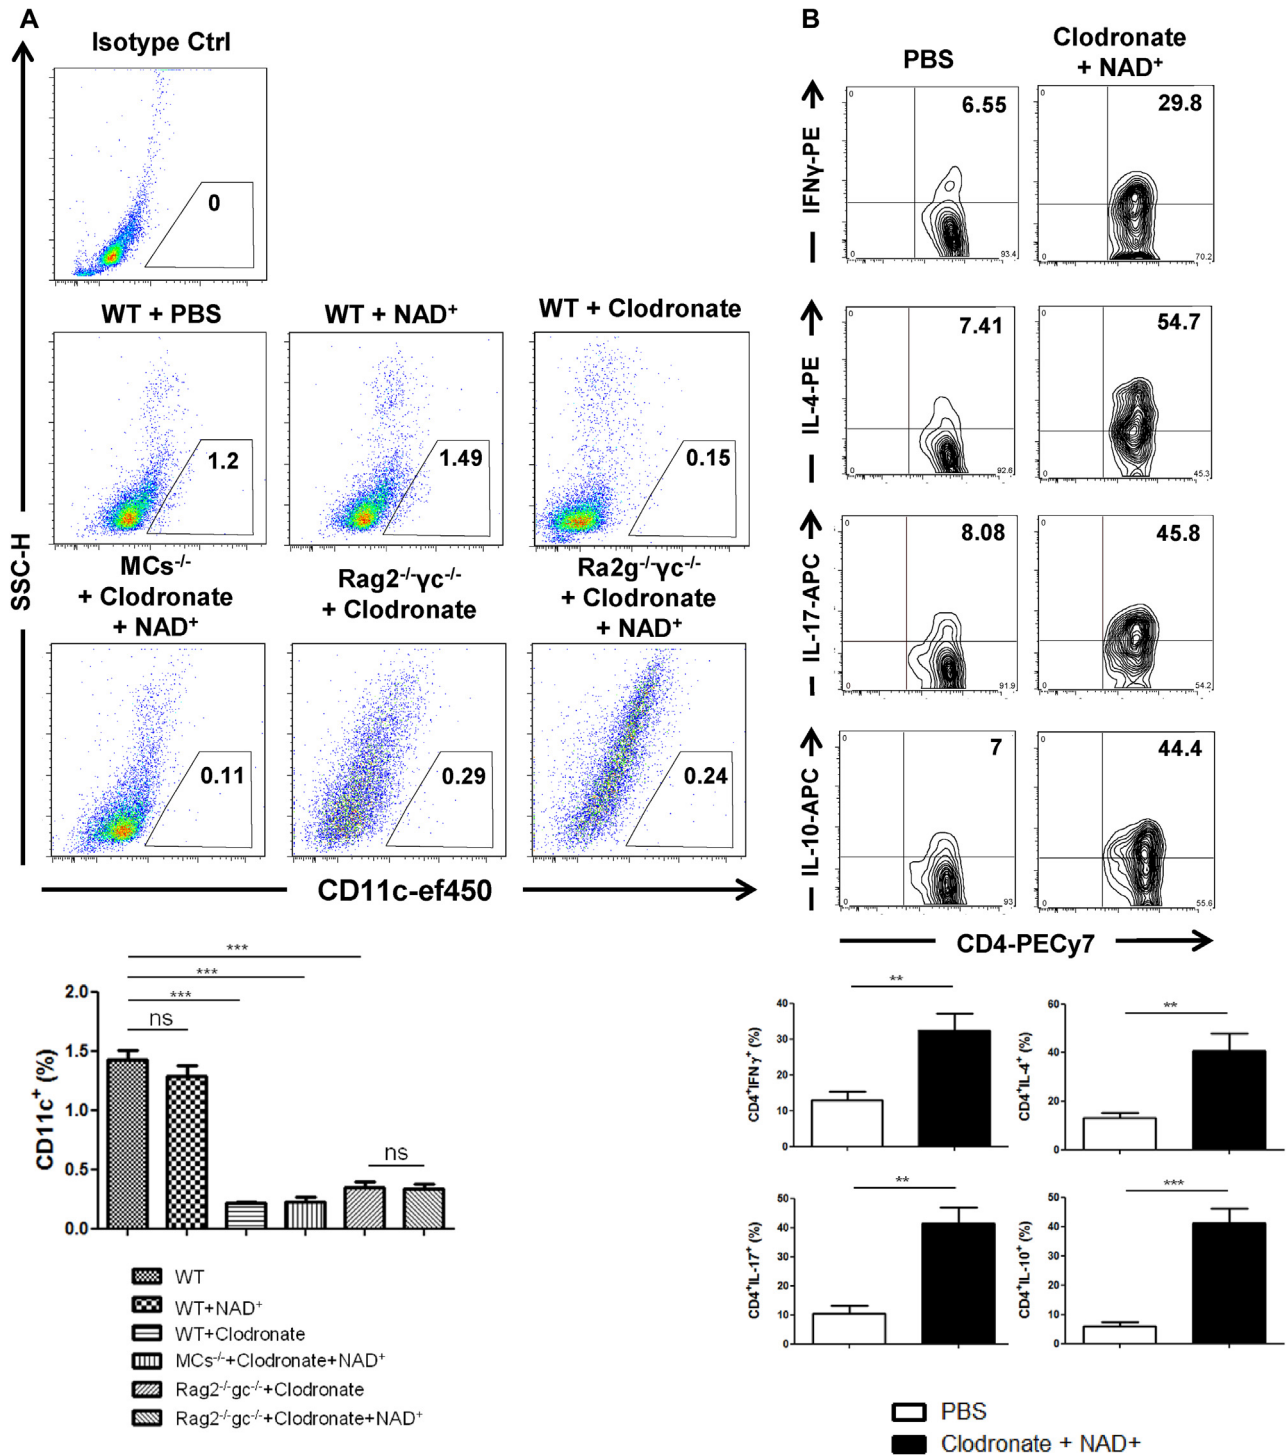

**FIG E2.** *In vivo* depletion of DCs by means of liposomal clodronate administration does not alter NAD<sup>+</sup>-mediated CD4<sup>+</sup> T-cell differentiation. **A**, C57BL/6 WT, MC<sup>-/-</sup>, and Rag2<sup>-/-</sup>γc<sup>-/-</sup> mice were treated intravenously with liposomal clodronate at -8 days, -5 days, and -1 day before NAD<sup>+</sup> treatment. Data derived from 2 independent experiments (n = 5 per group). **B**, C57BL/6 WT mice were treated intravenously with liposomal clodronate at -8 days, -5 days, and -1 day before NAD<sup>+</sup> treatment. Mice were then treated with daily intraperitoneal injections of 40 mg of NAD<sup>+</sup> or a placebo solution (PBS). After 7 days, mice were killed, and frequencies of CD4<sup>+</sup>IFN-γ<sup>+</sup>, CD4<sup>+</sup>IL-4<sup>+</sup>, and CD4<sup>+</sup>IL-17A<sup>+</sup> cells were analyzed by using flow cytometry. Data were derived from 2 independent experiments (n = 10). Data represent means ± SDs. ns, Not significant. The Student *t* test and ANOVA were used to compare between groups: \*\**P* < .01 and \*\*\**P* < .001. APC, Allophycocyanin; PE, phycoerythrin; SSC, side scatter.

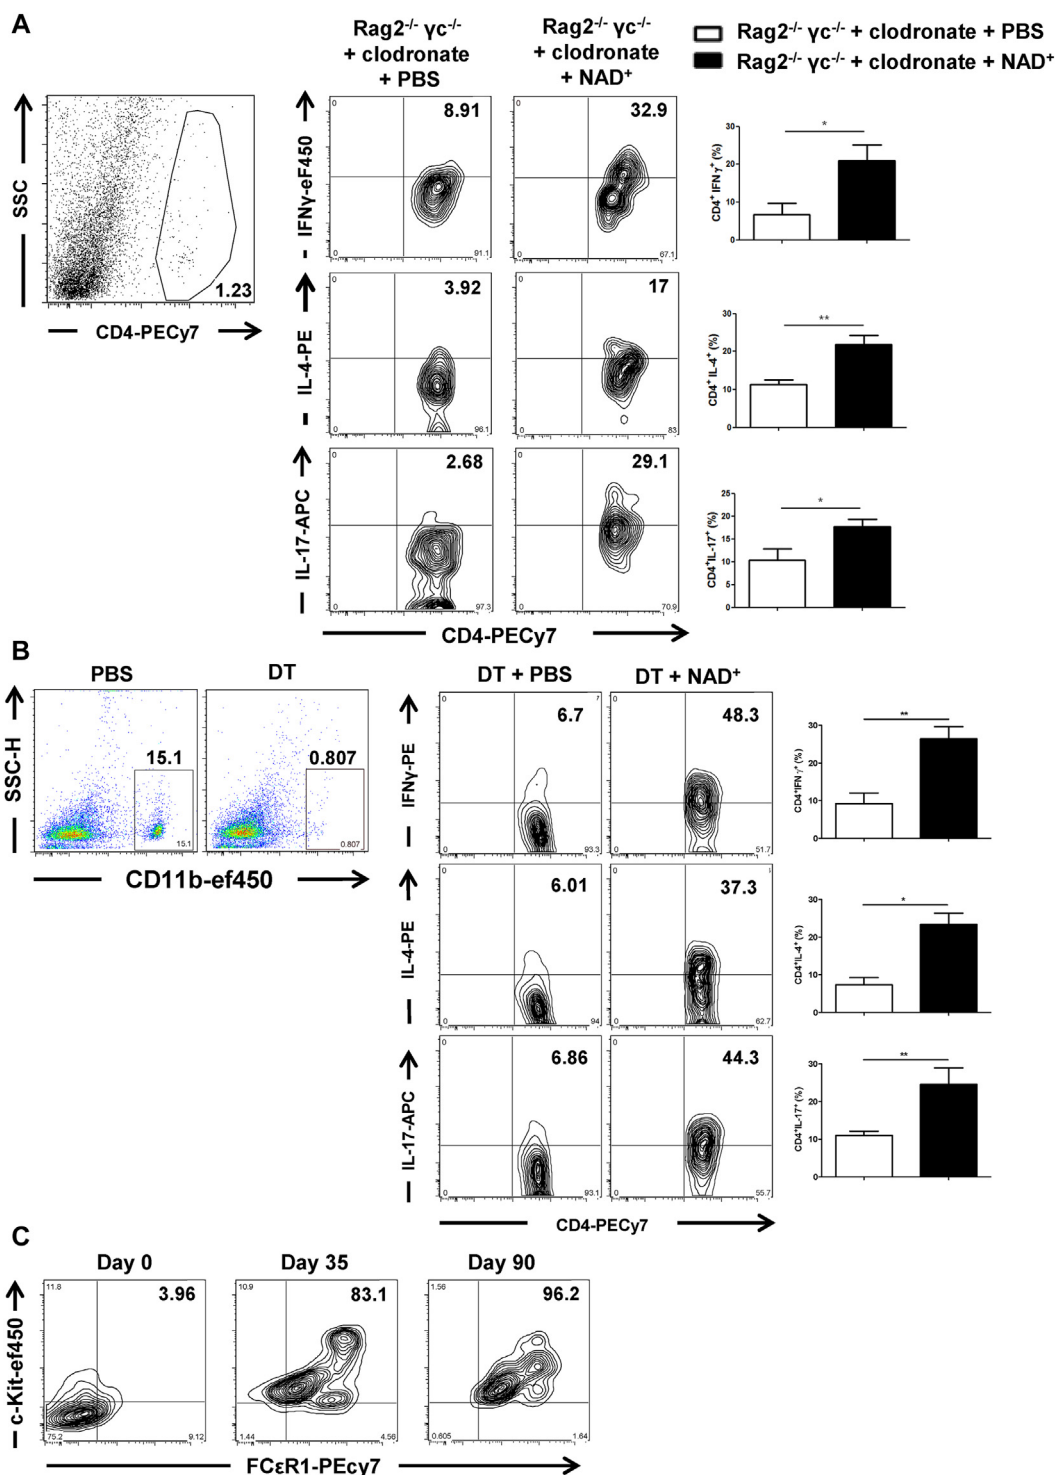

**FIG E3.** NAD<sup>+</sup> promotes T-cell differentiation in Rag2<sup>-/-</sup> γc<sup>-/-</sup> mice and flow cytometry of *in vitro* differentiation of BMMCs. **A**, Rag2<sup>-/-</sup> γc<sup>-/-</sup> mice were treated intravenously with liposomal clodronate at -8 days, -5 days, and -1 day before NAD<sup>+</sup> treatment. After depletion, sorted naive CD4<sup>+</sup>CD44<sup>-</sup>CD62L<sup>+</sup> T cells from C57BL/6 WT mice sorted by means of fluorescence-activated cell sorting were adoptively transferred (3 × 10<sup>6</sup> cells per adoptive transfer). Animals were then treated with daily intraperitoneal injections of 40 mg of NAD<sup>+</sup> or a placebo solution (PBS). After 7 days, mice were killed, spleens were collected, and frequencies of CD4<sup>+</sup>IFN-γ<sup>+</sup>, CD4<sup>+</sup>IL-4<sup>+</sup>, and CD4<sup>+</sup>IL-17A<sup>+</sup> cells were assessed by using flow cytometry. Data were derived from 2 independent experiments (n = 10). **B**, CD11b-DTR transgenic mice weighing 25 to 30 g were injected with diphtheria toxin (DT; 25 ng/g body weight) 24 hours before and 72 hours after beginning NAD<sup>+</sup> or PBS administration for depletion of CD11b<sup>+</sup> cells. After 7 days of treatment with PBS or NAD<sup>+</sup>, frequencies of CD4<sup>+</sup>IFN-γ<sup>+</sup>, CD4<sup>+</sup>IL-4<sup>+</sup>, and CD4<sup>+</sup>IL-17A<sup>+</sup> cells were assessed by using flow cytometry. Data were derived from 2 independent experiments (n = 10). **C**, BMMCs were obtained from femurs and tibiae of 6- to 8-week-old C57BL/6 WT mice. BMMCs were cultured in WEHI-3-conditioned medium over 90 days. Purities of c-Kit<sup>+</sup>FCeR1<sup>+</sup> MCs were then assessed by using flow cytometry. Data represent means ± SDs. The Student *t* test was used to compare between groups: \**P* < .05 and \*\**P* < .01. APC, Allophycocyanin; PE, phycoerythrin; SSC, side scatter.

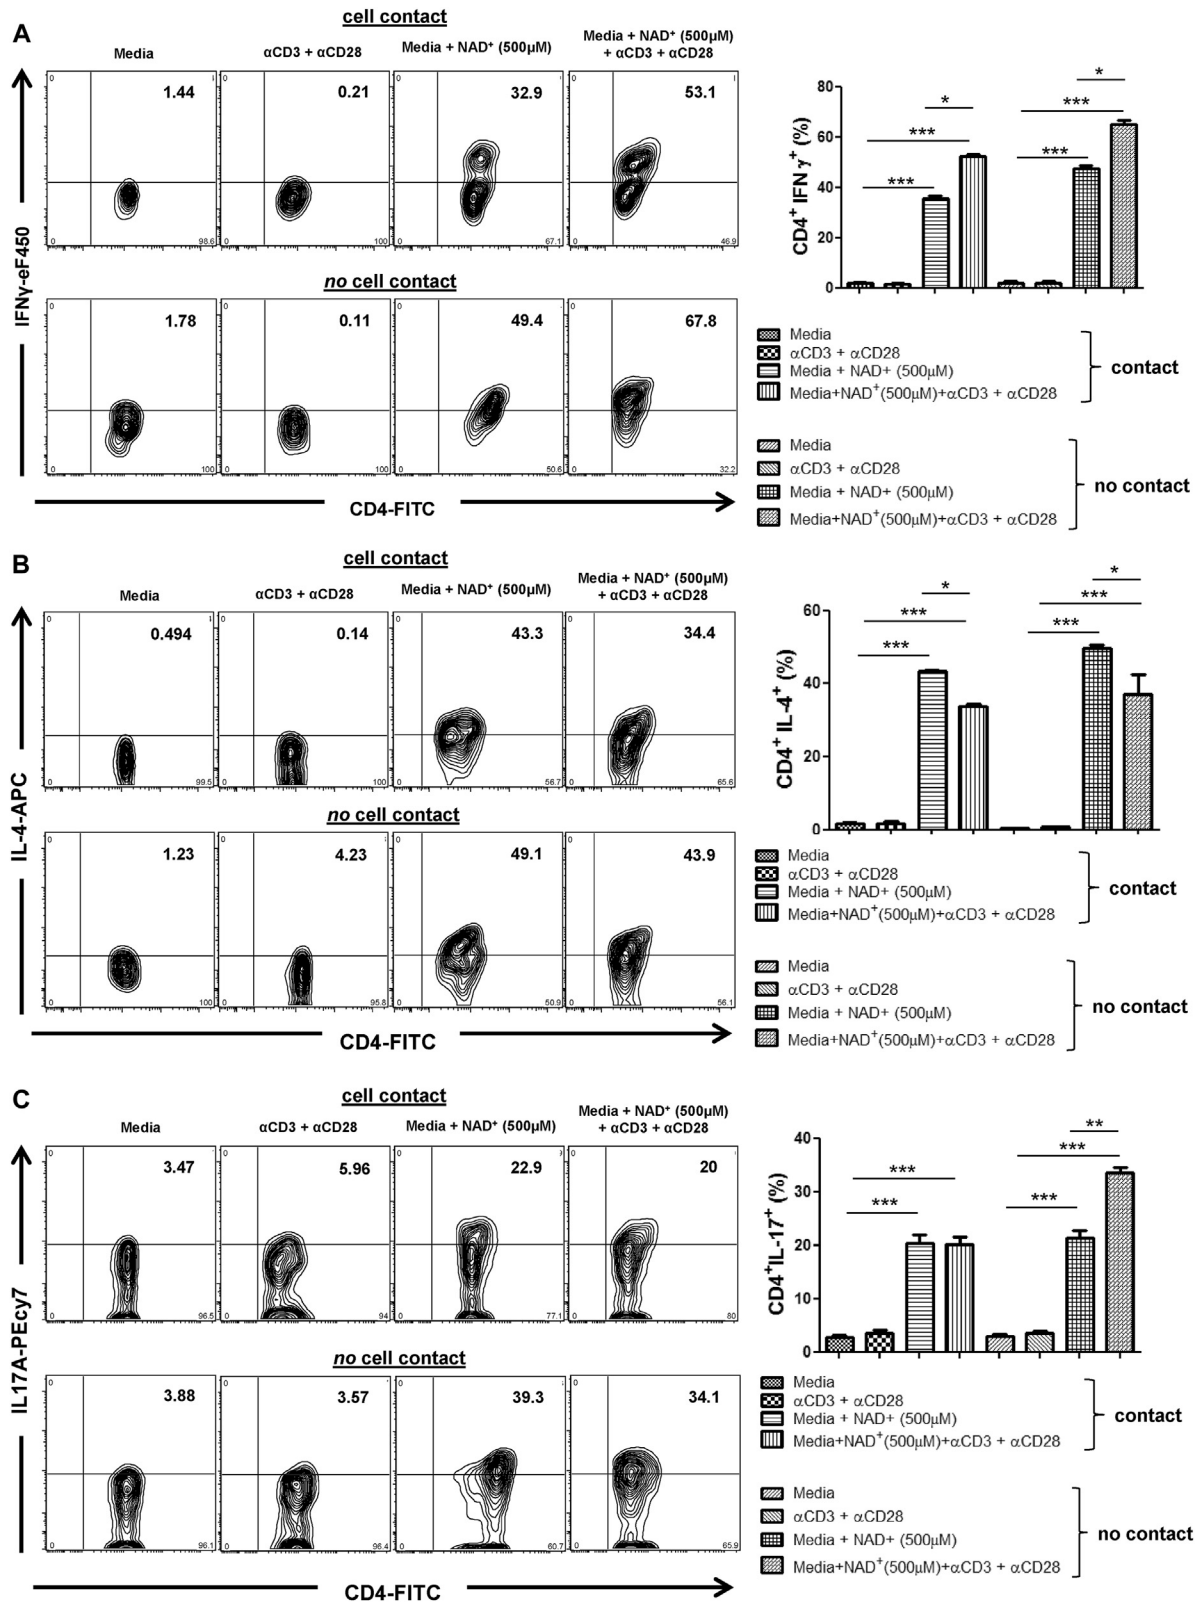

**FIG E4.** Murine MCs promote CD4<sup>+</sup>IFN- $\gamma$ <sup>+</sup>, CD4<sup>+</sup>IL-4<sup>+</sup>, and CD4<sup>+</sup>IL-17A<sup>+</sup> T-cell differentiation in the presence of NAD<sup>+</sup> both with and without cell-cell contact. BMMCs were cocultured with isolated naive CD4<sup>+</sup>CD44<sup>-</sup>CD62L<sup>+</sup> T cells from C57BL/6 mice (1:100 ratio) either in cell-cell contact or in separate compartments by using a transwell system. Cells were then treated with NAD<sup>+</sup> (500  $\mu$ mol/L) or PBS. After 96 hours, frequencies of CD4<sup>+</sup>IFN- $\gamma$ <sup>+</sup> (A), CD4<sup>+</sup>IL-4<sup>+</sup> (B), and CD4<sup>+</sup>IL-17A<sup>+</sup> (C) cells were assessed by using flow cytometry (n = 6). Data were derived from 2 independent experiments. \* $P$  < .05, \*\* $P$  < .01, and \*\*\* $P$  < .001, as determined by means of ANOVA, comparing the indicated groups. Data represent means  $\pm$  SDs. APC, Allophycocyanin; FITC, fluorescein isothiocyanate; PE, phycoerythrin.

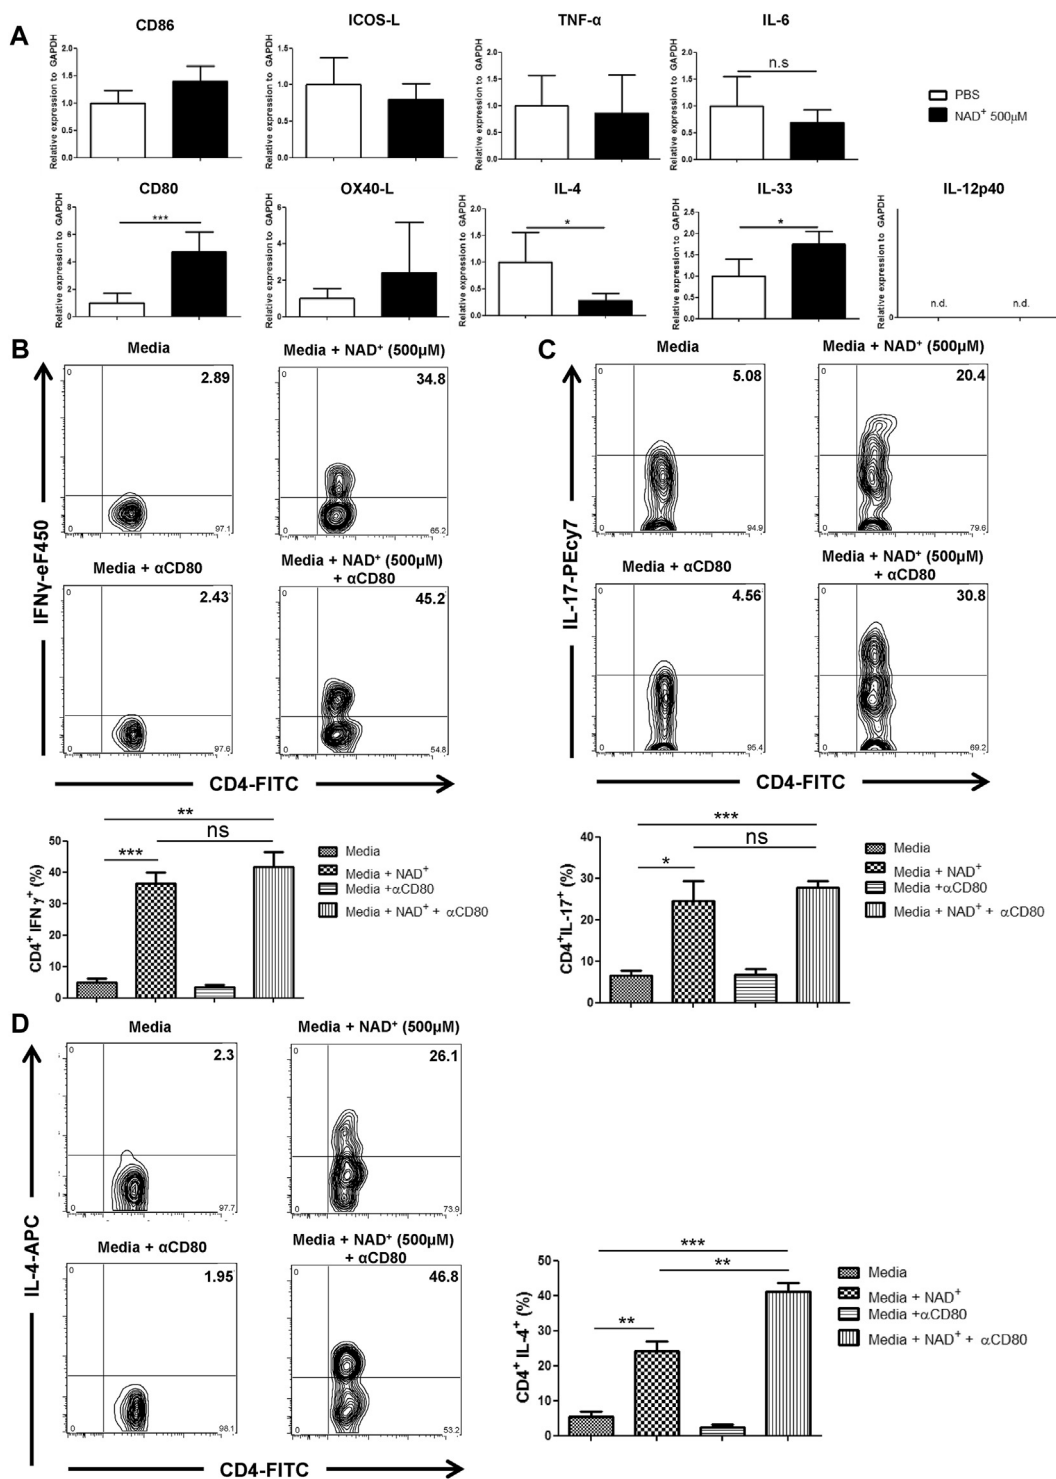

**FIG E5.** MCs do not regulate CD4<sup>+</sup> T-cell differentiation in the presence of NAD<sup>+</sup> through CD80. **A**, BMMCs from C57BL/6 mice were cultured in the presence of NAD<sup>+</sup> (500 μmol/L) or placebo (PBS). After 24 hours of culture, cells were collected, and mRNA was extracted. mRNA levels of CD86, CD80, TNF-α, IL-4, inducible costimulator ligand (*ICOS-L*), OX40 ligand (*OX40-L*), IL-6, and IL-33 were determined by using real-time PCR. Values are expressed as fold expression relative to the housekeeping gene glyceraldehyde-3-phosphate dehydrogenase (*GAPDH*). **B** and **C**, BMMCs were cocultured with isolated naive CD4<sup>+</sup>CD44<sup>+</sup>CD62L<sup>+</sup> T cells from C57BL/6 mice (1:100 ratio) in cell-cell contact conditions in the presence of α-CD80, NAD<sup>+</sup> (500 μmol/L), or placebo (PBS), as indicated. **B-D**, After 96 hours, frequencies of CD4<sup>+</sup>IFN-γ<sup>+</sup> (Fig E5, **B**), CD4<sup>+</sup>IL-17A<sup>+</sup> (Fig E5, **C**), and CD4<sup>+</sup>IL-4<sup>+</sup> (Fig E5, **D**) cells were assessed by using flow cytometry (n = 6). Data were derived from 2 independent experiments. *ns*, Not significant. \**P* < .05, \*\**P* < .01, and \*\*\**P* < .001, as determined by using the Student *t* test and ANOVA, comparing the indicated groups. Data represent means ± SDs. *APC*, Allophycocyanin; *FITC*, fluorescein isothiocyanate; *PE*, phycoerythrin.

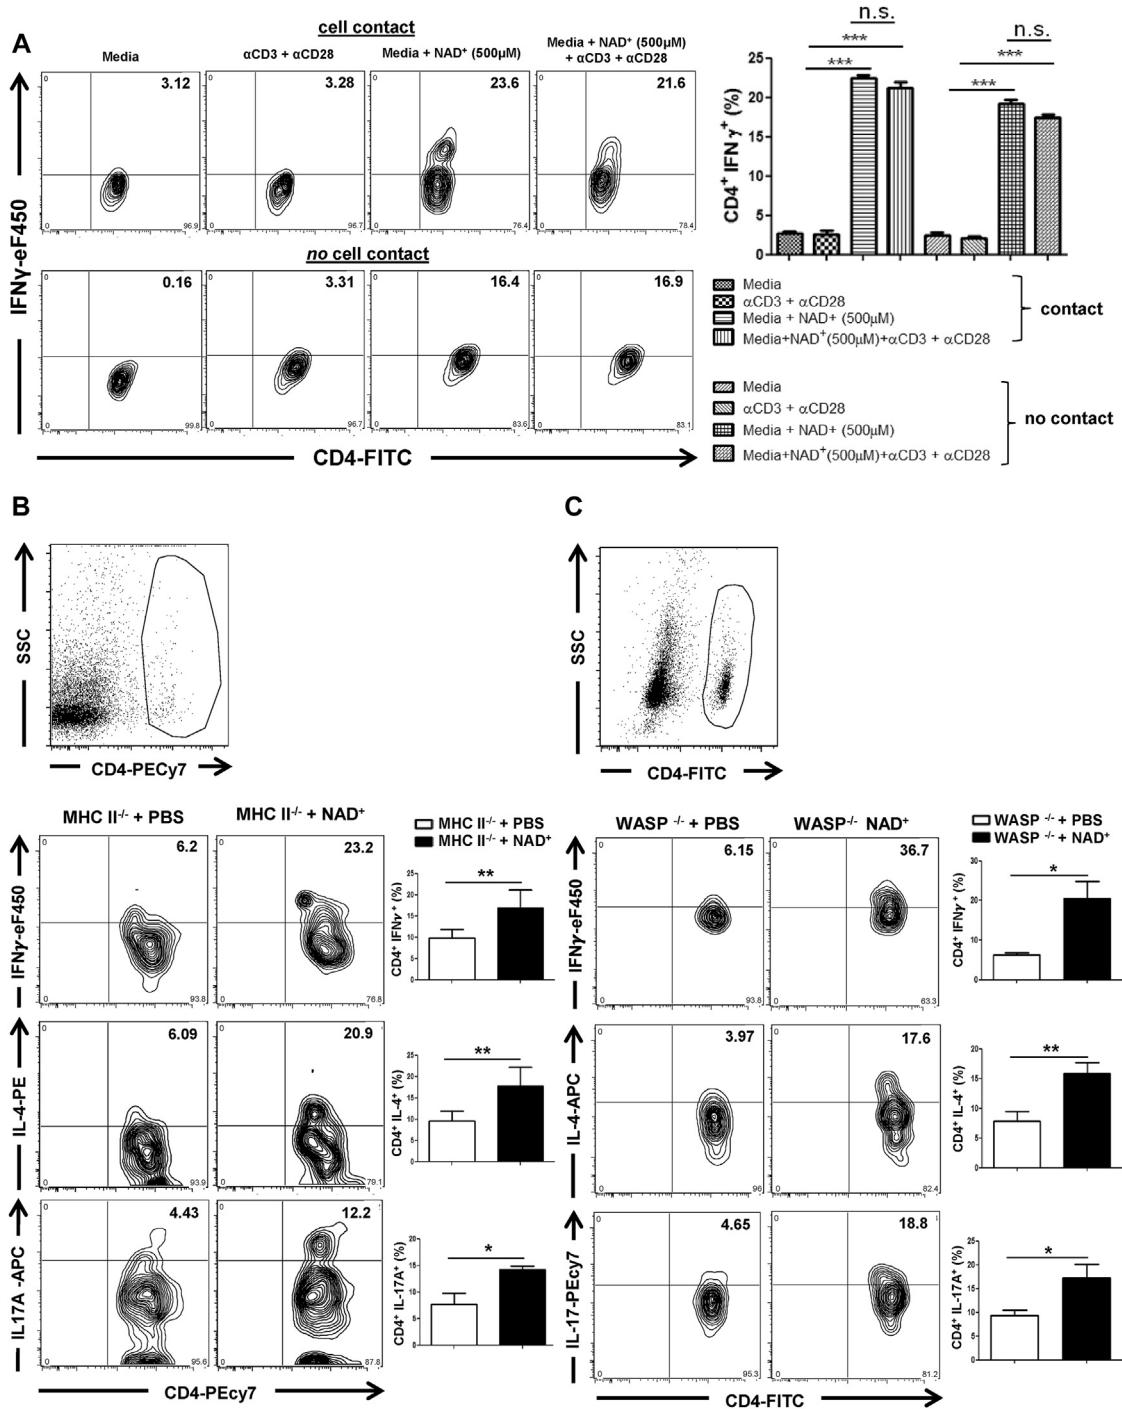

**FIG E6.** Conserved MC-mediated CD4<sup>+</sup> T-cell differentiation in the human MC line LAD-2 in the presence of NAD<sup>+</sup>. NAD<sup>+</sup> induces T-cell differentiation in MHC class II<sup>-/-</sup> and WASP<sup>-/-</sup> mice. **A**, Human MC line LAD-2 cells were cocultured with isolated human naive CD4<sup>+</sup> T cells from healthy donors (1:100 ratio) either in cell-cell contact or in separate compartments by using a transwell system. Cells were then treated with NAD<sup>+</sup> (500  $\mu$ M/l) or PBS. After 96 hours, frequencies of CD4<sup>+</sup>IFN- $\gamma$ <sup>+</sup> cells were assessed by using flow cytometry (n = 6). Data were derived from 2 independent experiments. **B**, MHC class II<sup>-/-</sup> (B6.129S-H2<sup>dIAb1-Ea</sup>) mice were treated daily with intraperitoneal injections of 40 mg of NAD<sup>+</sup> or a placebo solution (PBS). After 7 days, mice were killed, and splenocytes were harvested. Systemic frequencies of CD4<sup>+</sup>IFN- $\gamma$ <sup>+</sup>, CD4<sup>+</sup>IL-4<sup>+</sup>, and CD4<sup>+</sup>IL-17A<sup>+</sup> cells were analyzed by means of flow cytometry. Data were derived from 2 independent experiments (n = 5). **C**, WASP<sup>-/-</sup> (B6.129S6-Was<sup>tm1Sb3/J</sup>) mice were treated daily with intraperitoneal injections of 40 mg of NAD<sup>+</sup> or a placebo solution (PBS). After 7 days, mice were killed, and frequencies of CD4<sup>+</sup>IFN- $\gamma$ <sup>+</sup>, CD4<sup>+</sup>IL-4<sup>+</sup>, and CD4<sup>+</sup>IL-17A<sup>+</sup> cells were assessed by means of flow cytometry. Data were derived from 2 independent experiments (n = 5). ns, Not significant. \*P < .05, \*\*P < .01, and \*\*\*P < .001, as determined by using the Student t test and ANOVA, comparing the indicated groups. Data represent means  $\pm$  SDs. APC, Allophycocyanin; FITC, fluorescein isothiocyanate; PE, phycoerythrin; SSC, side scatter.

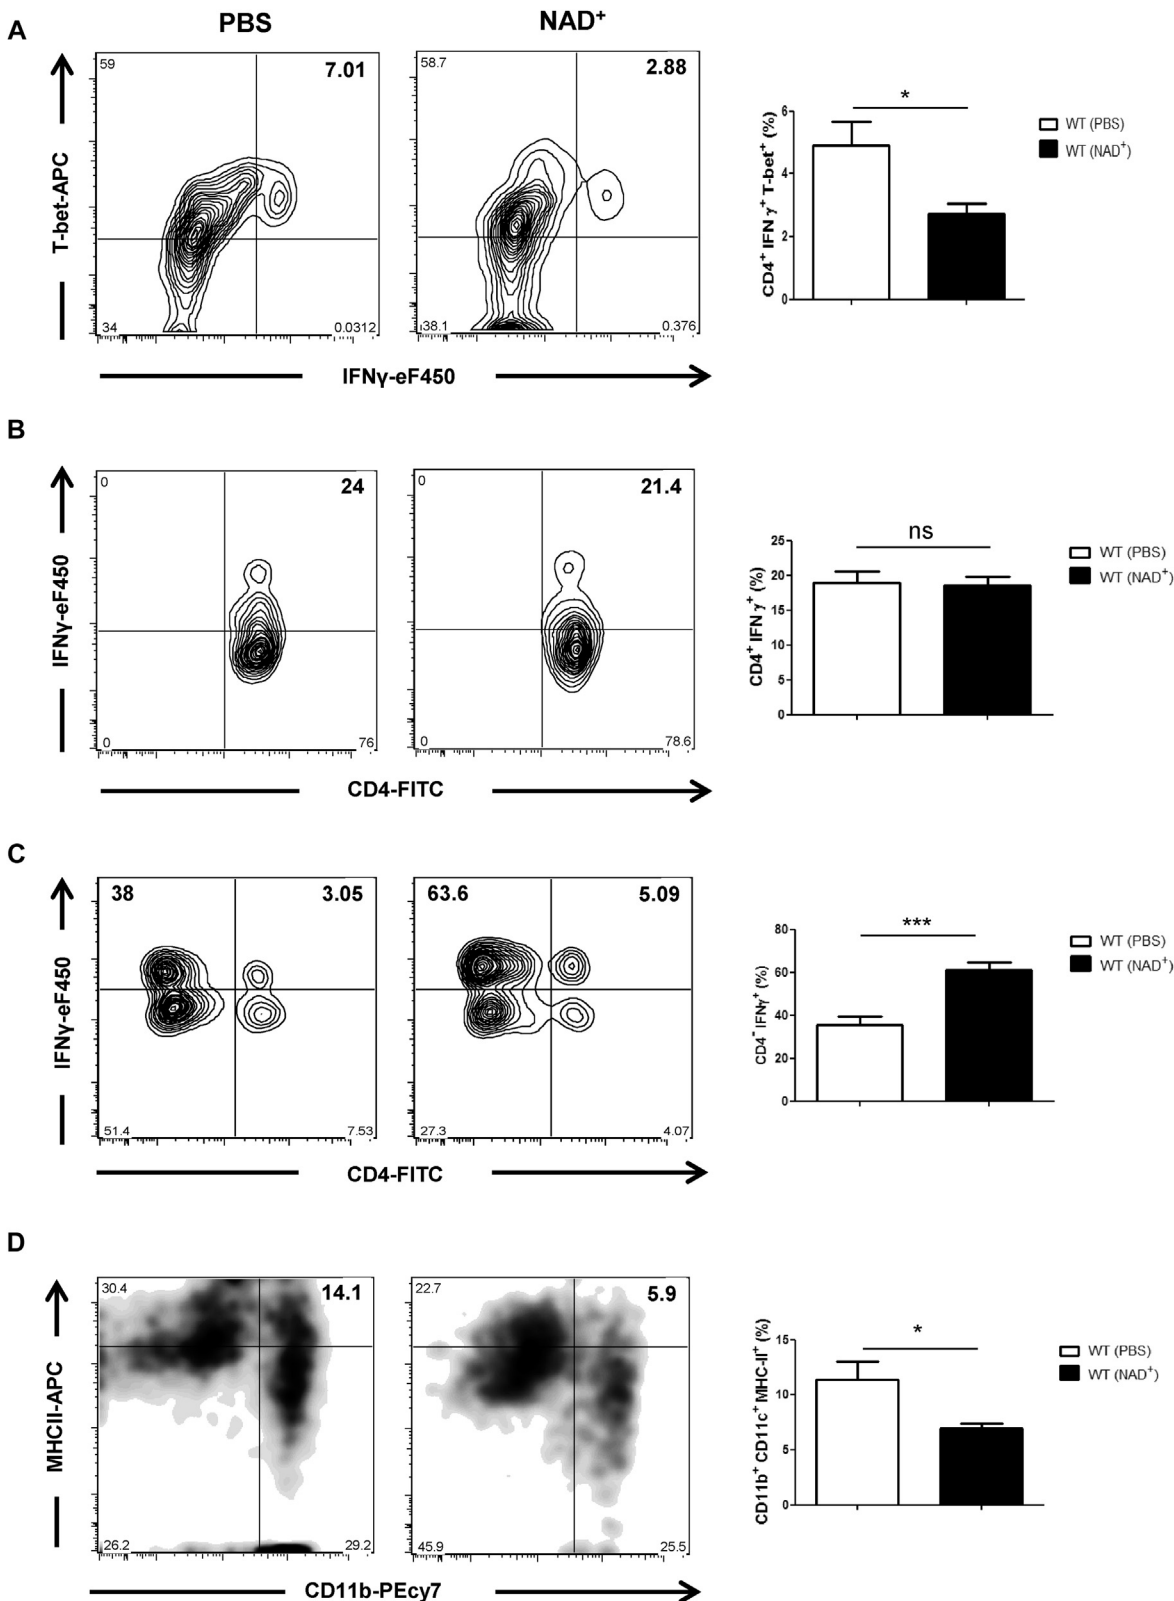

**FIG E7.** NAD<sup>+</sup> alters systemic frequencies of CD4<sup>+</sup>T-bet<sup>+</sup>IFN- $\gamma$ <sup>+</sup> cells and CD11c<sup>+</sup>MHC class II<sup>+</sup> DCs after *L monocytogenes* infection. C57BL/6 mice were treated for 5 days with daily intraperitoneal injections of NAD<sup>+</sup> (40 mg) or placebo solution (PBS). After 5 days, mice were infected with a nonlethal dose of *L monocytogenes* ( $1 \times 10^7$  colony-forming units) and killed 3 days later. Spleens were collected, and frequencies of CD4<sup>+</sup>T-bet<sup>+</sup>IFN- $\gamma$ <sup>+</sup> (A), CD4<sup>+</sup>IFN- $\gamma$ <sup>+</sup> (B), and CD4<sup>+</sup>IFN- $\gamma$ <sup>+</sup> (C) T cells and CD11b<sup>+</sup>CD11c<sup>+</sup>MHC class II<sup>+</sup> DCs (D) were assessed by using flow cytometry. Data were derived from 2 independent experiments (n = 5). Data represent means  $\pm$  SDs. ns, Not significant. The Student *t* test was used to compare between groups: \**P* < .05 and \*\*\**P* < .001.
